# Supplementary material for: Prognostic Value of CT-Attenuation and 18F-Fluorodeoxyglucose Uptake of Periprostatic Adipose Tissue in Patients with Prostate Cancer
Source: J Pers Med. 2020 Oct 22;10(4):185. doi: 10.3390/jpm10040185 (PMC7711777; doi:10.3390/jpm10040185)
Supplement: Supplementary file 1 [file jpm-10-00185-s001.pdf]

**Supplementary Figure S1.** Distribution of computed tomography-attenuation (Hounsfield unit) of periprostatic adipose tissue according to T stage (a), N stage (b), and M stage (c) and standardized uptake value of periprostatic adipose tissue according to T stage (d), N stage (e), and M stage (f).

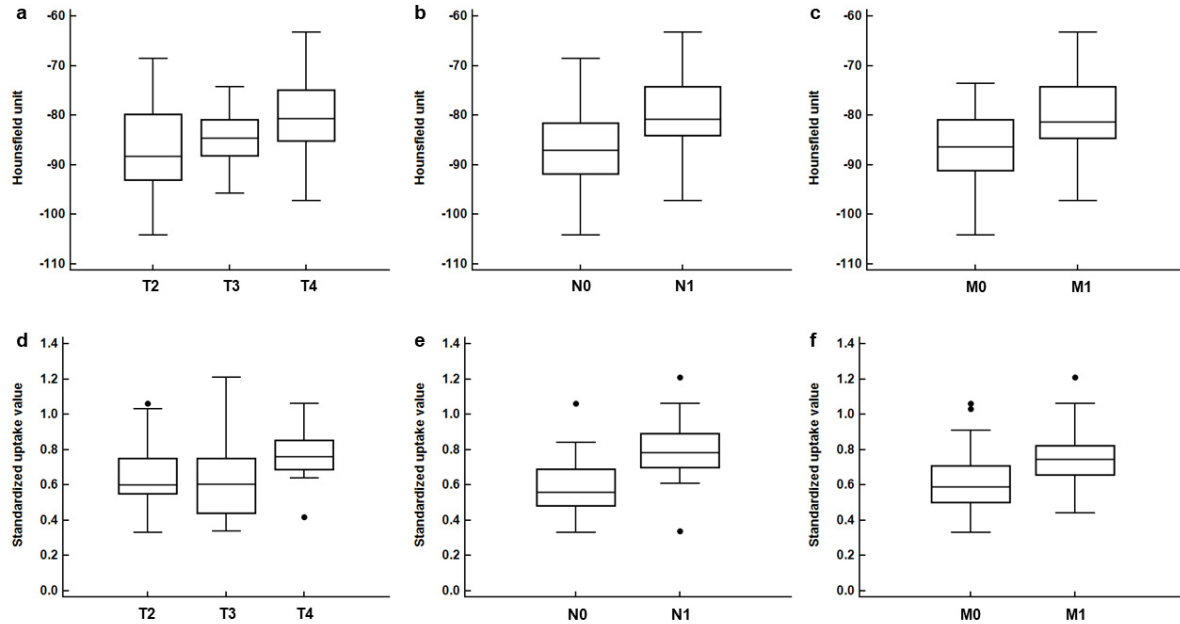

**Supplementary Table S1.** Relationship of the HU and SUV of the SAT and VAT with Gleason grade group and tumor stage.

| Variables           |           | SAT HU       | SAT SUV   | VAT HU      | VAT SUV   |
|---------------------|-----------|--------------|-----------|-------------|-----------|
| Gleason grade group | Grade 1   | -101.63±5.92 | 0.30±0.04 | -98.31±8.37 | 0.47±0.08 |
|                     | Grade 2-3 | -101.72±7.31 | 0.31±0.08 | -99.65±7.70 | 0.48±0.14 |
|                     | Grade 4-5 | -97.52±8.96  | 0.32±0.09 | -93.16±8.42 | 0.50±0.15 |
|                     | P-value   | 0.047        | 0.879     | 0.012       | 0.890     |
| T stage             | T2 stage  | -100.18±8.88 | 0.33±0.06 | -98.11±8.99 | 0.51±0.11 |
|                     | T3 stage  | -98.94±6.23  | 0.29±0.09 | -94.70±7.80 | 0.46±0.15 |
|                     | T4 stage  | -98.58±11.51 | 0.35±0.09 | -93.35±9.44 | 0.52±0.14 |
|                     | P-value   | 0.548        | 0.059     | 0.166       | 0.156     |
| N stage             | N0 stage  | -99.95±7.37  | 0.30±0.07 | -95.91±8.27 | 0.46±0.12 |
|                     | N1 stage  | -98.21±9.85  | 0.35±0.09 | -93.62±9.15 | 0.54±0.15 |
|                     | P-value   | 0.457        | 0.006     | 0.198       | 0.058     |
| M stage             | M0 stage  | -100.11±7.18 | 0.31±0.07 | -97.21±7.96 | 0.47±0.12 |
|                     | M1 stage  | -97.48±10.47 | 0.34±0.10 | -92.28±9.50 | 0.54±0.15 |
|                     | P-value   | 0.223        | 0.179     | 0.046       | 0.072     |

\*On post-hoc analysis, patients with grade 4-5 showed significantly higher values than those with grade 1 and grade 2-3 ( $p < 0.05$ ), whereas no significant difference was shown between patients with grade 1 and grade 2-3 ( $p > 0.05$ ).

HU, Hounsfield units; SAT, subcutaneous adipose tissue; SUV, standardized uptake value; VAT, visceral adipose tissue
